# Supplementary material for: Regulation of Anti-Plasmodium Immunity by a LITAF-like Transcription Factor in the Malaria Vector Anopheles gambiae
Source: PLoS Pathog. 2012 Oct 18;8(10):e1002965. doi: 10.1371/journal.ppat.1002965 (PMC3475675; doi:10.1371/journal.ppat.1002965)
Supplement: Table S1 — Primers used for RT-PCR, amplification of SRPN6 promoter fragments, and oligonucleotide probes. (XLSX) [file ppat.1002965.s007.xlsx]

## Sheet: Sheet1
Table S1
Semi-quantitative RT-PCR (Sup. Fig 1)
Gene	Forward	Reverse
rpS7	AGCTCGACGGATCCCAGCTGATAAAGG	TCCACCCCGATTTCTCCGATCTTTCAC
SRPN6	GTACGTGAATCAGATCCTGCACAAGCTA	TAAATTCGAATCCATCCCTGGTTTCATC
AGAP009051 (LL1)	AACGCAGCCGCTAAATCAGCTACCATACC	GATGTGCGTTTTGGTCGAGGTTTCATAGTC
AGAP009052 (LL2)	ACAGAGACCACCGTGATCGTTACCAGC	ATACGTGCCAATGAACGAACCACAGTTCG
AGAP009053 (LL3)	GTACGCACGAAAGTGAAGCACGAATCG	CGGTGTCTGATGTCCTTCAATGTTTGTACGAG
AGAP009054 (LL4)	AGGCAAACACCAAAACGCACATCTACG	GCACTTAATGGCACCAATGTTAGAAAACTTCC
AGAP002435 (LL5)	CGAACATTCGGAGATGGGTAATCATAAACC	GAAGCGACCGTCGACGACCAGGTTACC
AGAP004928 (LL6)	GAGCTATGCGCAAGCCGTAGGAGGTG	TGTTACAGCTGTCGCGCAGGTTTATCG
SRPN6 promoter EMSAs (Sup. Fig 5 and 6)
AgSRPN6 Pro -1000/800	GCAGCCGGTATGGCCGGTTGTGGTTAAATTC	GGAGCTAGTGCCGGATGAAAACGATTCTG
AgSRPN6 Pro -800/600	ATGGTTATGATGTCATTTTGAAGGCGTTAAAT	ACCTTTACTTCCATTTCCTTGATGTTATTTAACAGTATCAG
AgSRPN6 Pro -600/400	TACTGGGCTTTCCACAATCTTGATCCA	CAAGGGTCAAGATTCGCACGAGAGTTTAG
AgSRPN6 Pro -400/200	CAGAACTGTTCTTCCTTCCACCCGTCAAG	GCAAATGGCACCAAGAGACGCGAGAAC
AgSRPN6 Pro -200/1	GATTGCAAATTTTGCACTTTTACGTCC	TGAATGGCTTCGATCGGCGGTGAAAC
rpS7 (non-specific)	AGCTCGACGGATCCCAGCTGATAAAGG	TCCACCCCGATTTCTCCGATCTTTCAC
SRPN6 -800 to -761	ATGGTTATGATGTCATTTTGAAGGCGTTAAATGCTTTTAG	CTAAAAGCATTTAACGCCTTCAAAATGACATCATAACCAT
SRPN6 -760 to -721	AGTGTGTTTAAGCTTCCGATTAGACCTAGTTGATTAGACC	GGTCTAATCAACTAGGTCTAATCGGAAGCTTAAACACACT
SRPN6 -720 to -684	AAGGATTTATAATGGCTGGCAGTTAATGTTTGTTTA	TAAACAAACATTAACTGCCAGCCATTATAAATCCTT
SRPN6 -683 to -641	TTGTGGGATTAATGCGCATGTTTGTTTGAGCAGCTGGAAATCAC	GTGATTTCCAGCTGCTCAAACAAACATGCGCATTAATCCCACAA
SRPN6 -640 to -601	TGATACTGTTAAATAACATCAAGGAAATGGAAGTAAAGGT	ACCTTTACTTCCATTTCCTTGATGTTATTTAACAGTATCA
SRPN6 -400 to -361	CAGAACTGTTCTTCCTTCCACCCGTCAAGGACTACCACTT	AAGTGGTAGTCCTTGACGGGTGGAAGGAAGAACAGTTCTG
SRPN6 -360 to -321	TCGGAGGGATCACCGAAGGAAAGATGTCGCACCAGTGCTA	TAGCACTGGTGCGACATCTTTCCTTCGGTGATCCCTCCGA
SRPN6 -320 to -281	CCACTGCTTCCGAGAAACGGAGCGTAAAGGACGCTCACTG	CAGTGAGCGTCCTTTACGCTCCGTTTCTCGGAAGCAGTGG
SRPN6 -280 to -241	TTTGAACGCGATCCTCAAACAACCCGACCGACCTCCCAAA	TTTGGGAGGTCGGTCGGGTTGTTTGAGGATCGCGTTCAAA
SRPN6 -240 to -201	ACGTGTAACACGTGTTCTCGCGTCTCTTGGTGCCATTTGC	GCAAATGGCACCAAGAGACGCGAGAACACGTGTTACACGT
SRPN6 -200 to -163	GATTGCAAATTTTGCACTTTTACGTCCAAGCACTCCA	TGGAGTGCTTGGACGTAAAAGTGCAAAATTTGCAATC
SRPN6 -162 to -121	TGGGGGAGCAGCAGCAGCAGCAGCAGCAGCATGGGGAACGAC	GTCGTTCCCCATGCTGCTGCTGCTGCTGCTGCTGCTCCCCCA
SRPN6 -120 to -82	GTCGTTCCCCATGCTGCTGCTGCTGCTGCTGCTGCTCCCCCA	GGAACAGATGTAACGCCAGGGCAATGGGGCACGCATGGT
SRPN6 -81 to -41	GCCACGGCACATGAGTCATGGTGACGGACGCTCGCGCAACA	TGTTGCGCGAGCGTCCGTCACCATGACTCATGTGCCGTGGC
SRPN6 -40 to -1	GAAGCACATAAAACTGTTTCACCGCCGATCGAAGCCATTCA	TGAATGGCTTCGATCGGCGGTGAAACAGTTTTATGTGCTTC
SRPN6 -800 to -761 Mut 1	AAAAAAAAAATGTCATTTTGAAGGCGTTAAATGCTTTTAG	CTAAAAGCATTTAACGCCTTCAAAATGACATTTTTTTTTT
SRPN6 -800 to -761 Mut 2	ATGGTTATGAAAAAAAAAAAAAGGCGTTAAATGCTTTTAG	CTAAAAGCATTTAACGCCTTTTTTTTTTTTTCATAACCAT
SRPN6 -800 to -761 Mut 3	ATGGTTATGATGTCATTTTGAAAAAAAAAAATGCTTTTAG	CTAAAAGCATTTTTTTTTTTCAAAATGACATCATAACCAT
SRPN6 -800 to -761 Mut 4	ATGGTTATGATGTCATTTTGAAGGCGTTAAAAAAAAAAAA	TTTTTTTTTTTTAACGCCTTCAAAATGACATCATAACCAT
SRPN6 -163 to -121 Mut 1	AAAAAAAAAAAGCAGCAGCAGCAGCAGCAGCATGGGGAACGAC	GTCGTTCCCCATGCTGCTGCTGCTGCTGCTGCTTTTTTTTTTT
SRPN6 -163 to -121 Mut 2	ATGGGGGAGCAAAAAAAAAAACAGCAGCAGCATGGGGAACGAC	GTCGTTCCCCATGCTGCTGCTGTTTTTTTTTTTGCTCCCCCAT
SRPN6 -163 to -121 Mut 3	ATGGGGGAGCAGCAGCAGCAGAAAAAAAAAAATGGGGAACGAC	GTCGTTCCCCATTTTTTTTTTTCTGCTGCTGCTGCTCCCCCAT
SRPN6 -163 to -121 Mut 4	ATGGGGGAGCAGCAGCAGCAGCAGCAGCAGCAAAAAAAAAAAA	TTTTTTTTTTTTGCTGCTGCTGCTGCTGCTGCTGCTCCCCCAT
AgB2t pro (Non-specific)	CAAAAAAAAAGAAAACTTTTCAAGAAAATGCGAGAAATAG	CTATTTCTCGCATTTTCTTGAAAAGTTTTCTTTTTTTTTG
